# Supplementary material
Source: MDPI journal article supplement (https://www.mdpi.com/1999-4907/6/12/4376)
Supplement: s1 [file s1]

Supplementary Information

| Dimension 2 | 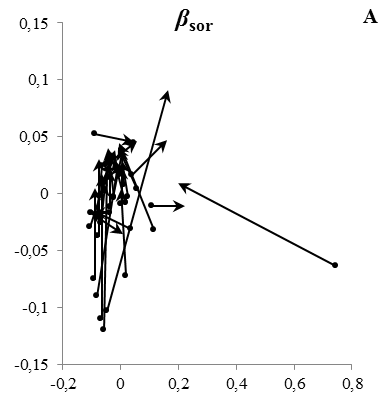 | 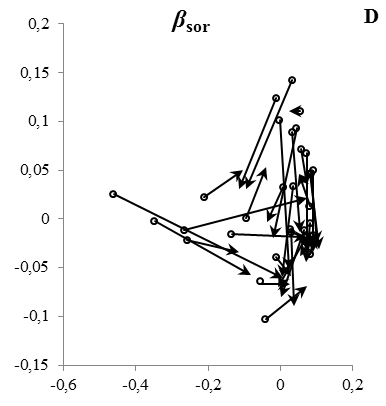 |
| --- | --- | --- |
| Dimension 2 | 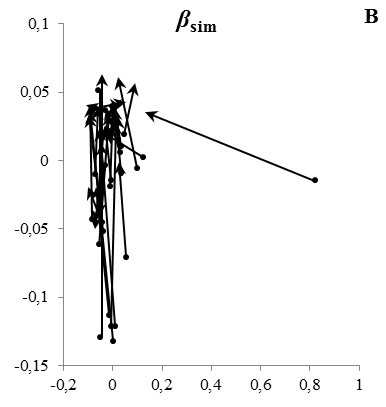 | 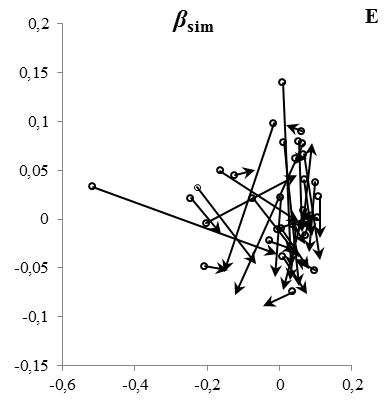 |
| Plot number | 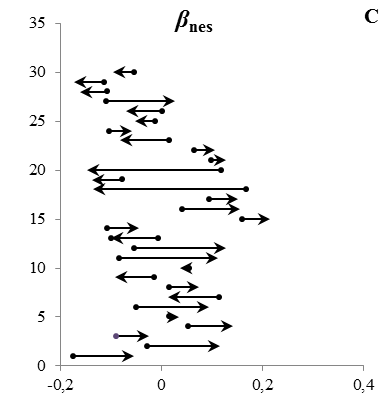 | 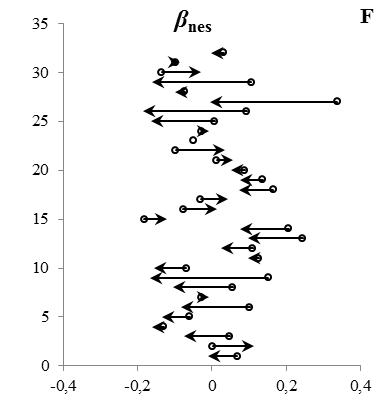 |
|  | Dimension 1 | |

**Figure S1.** Nonmetric multidimensional scaling of the investigated part of the Eastern Carpathian forest herb layer composition in the Western Bieszczady Mountains. Filled circles indicate managed WBM forests (**A**–**C**) and open circles indicate unmanaged WBM forests (**D**–**F**). The shifts between sampling periods are indicated by the arrows. See Table 3 for significance values of the shifts.

| Dimension 2 | 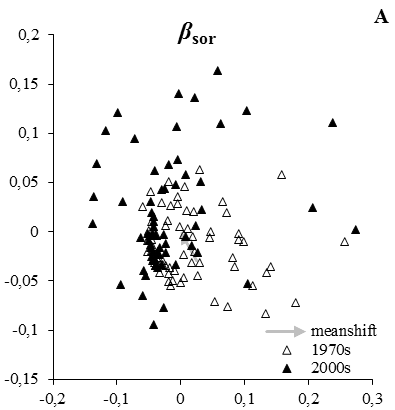 | 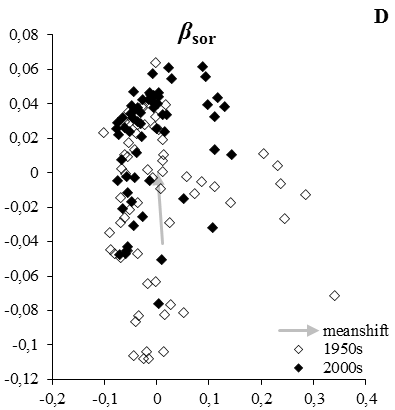 |
| --- | --- | --- |
| Dimension 2 | 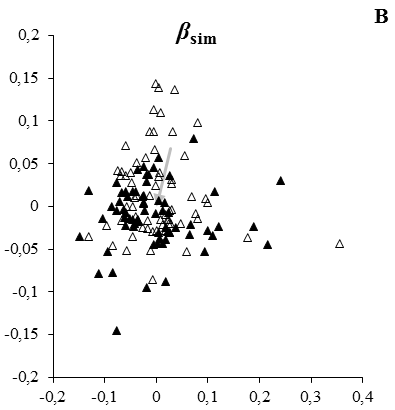 | 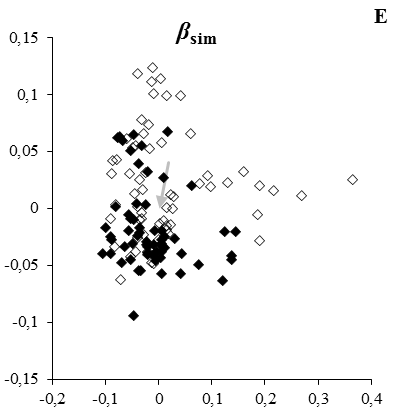 |
| Plot number | 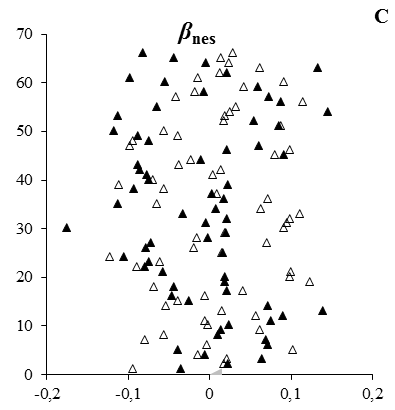 | 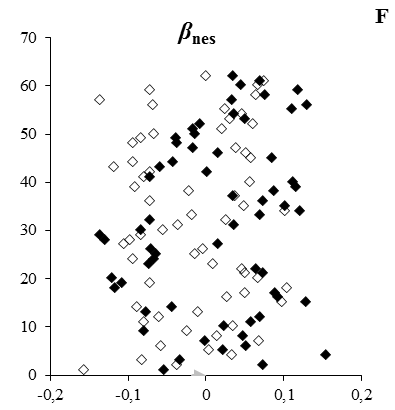 |
|  | Dimension 1 | |

**Figure S2.** Nonmetric multidimensional scaling of the Eastern Carpathian forest plant composition from two main subregions: the Sanocko-Turczanskie Mountains and the Western Bieszczady Mountains. (**A**–**C**) S-TM forest; (**D**–**F**) WBM forest. The mean shifts between sampling periods are indicated by the line section in the center of the coordinate system. See Table 3 for significance values of the shifts.
